# Supplementary material for: Thermoresponsive degradable hydrogels with renewable surfaces for protein removal
Source: Royal Society of Chemistry journal article supplement (doi:10.1039/d4bm01383b), 2024-11-16
Supplement: d4bm01383b1.pdf [file d4bm01383b1.pdf]

Supplementary Information for:

**Thermoresponsive degradable hydrogels with renewable surfaces for  
protein removal**

*Syuuhei Komatsu<sup>a,b</sup>, Naoki Kamei<sup>a</sup>, Akihiko Kikuchi<sup>\*a</sup>*

<sup>a</sup> Department of Materials Science and Technology, Tokyo University of Science

6-3-1 Nijjuku, Katsushika, Tokyo 125-8585, Japan

Phone: +81-3-5876-1415; Fax: +81-3-5876-1639; E-mail: kikuchia@rs.tus.ac.jp

<sup>b</sup> Faculty of Pharmacy and Pharmaceutical Sciences, Josai University, 1-1 Keyakidai,

Sakado, Saitama 350-0295, Japan

Contents

1. S1. Temperature dependent transmittance of byproducts
2. S2. The SN ratio of adsorbed BSA on poly(NIPAAm-g-PEG) hydrogel
3. S3. The SN ratio of adsorbed BSA and FBN on poly(MDO-co-NIPAAm) hydrogels.

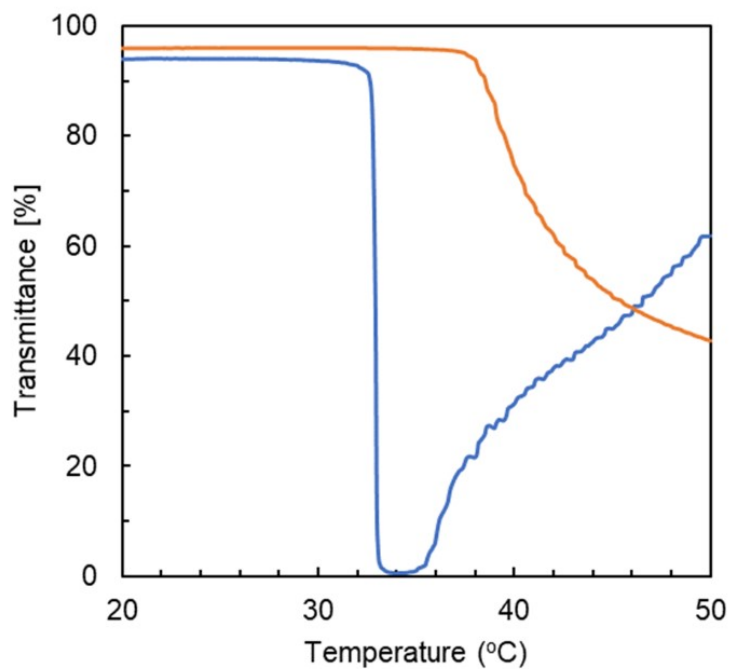

Figure S1 Temperature dependent transmittance of byproducts. Blue line: PNIPAAm (in water, polymer conc.; 1.0 wt%, Heating rate; 1.0°C/min). Orange line: byproducts from hydrogel after degradation (in water, polymer conc.; 1.0 wt%, Heating rate; 1.0°C /min). The degradation of prepared polymer was performed in 2 mmol/L NaOH aq. at 25°C for 24 h.

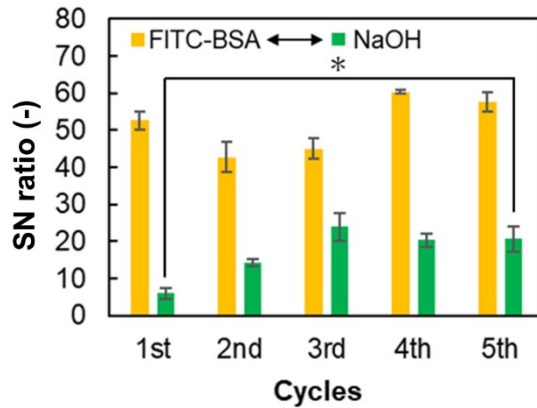

Figure S2 The SN ratio of adsorbed BSA on poly(NIPAAm-g-PEG) hydrogel (sample 3 in table 1). Hydrogel disks were alternately soaked in FITC-BSA containing PBS solution (yellow bar) for 1 h and NaOH aq. (pH11.2) (green bar) for 30 min, Data: mean $\pm$ SD (n=3, \*: p<0.05).

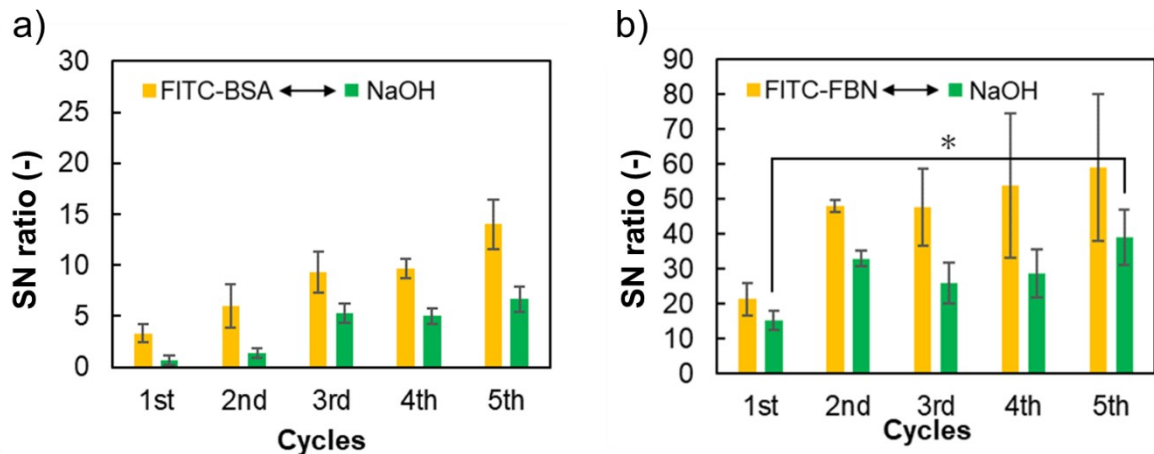

Figure S3 (a) The SN ratio of adsorbed BSA on poly(MDO-co-NIPAAm) hydrogels. SN ratio of adsorbed FITC-BSA on hydrogel surface. Yellow bars: Hydrogel soaked in FITC-BSA solution in each cycle. Green bars: Hydrogel soaked in NaOH solution in each cycle after 1 h soaking in PBS solution containing FITC-BSA. Data are expressed as the mean $\pm$ SD (n=3), n.s.: not significant. (b) SN ratio of adsorbed FITC-FBN on hydrogel surface. Yellow bars: Hydrogel soaked in PBS solution containing FITC-FBN in each cycle. Green bars: Hydrogel soaked in NaOH solution in each cycle after 1 h soaking in PBS solution containing FITC-FBN. Data are expressed as the mean $\pm$ SD (n=3), n.s.: not significant.
